# Supplementary material for: Systematic Construction of Kinetic Models from Genome-Scale Metabolic Networks
Source: PLoS One. 2013 Nov 14;8(11):e79195. doi: 10.1371/journal.pone.0079195 (PMC3852239; doi:10.1371/journal.pone.0079195)
Supplement: File S4 — Excel file containing detailed steady state fluxes and concentrations obtained from the primary model (File S2). (XLSX) [file pone.0079195.s004.xlsx]

## Sheet: Sheet1
This spreadsheet contains the following:
SteadyStateFlux:	steady-state fluxes of the model at its operating state(mM/s).
SteadyStateConcentration:	steady-state concentrations of the model at its operating state (mM).
50%IncGlucosePerturbationFlux	Transient fluxes for 120 second time course after a 50% increase in extracellular glucose concentration (mM/s)
50%DecGlucosePerturbationFlux	Transient fluxes for 120 second time course after a 50% decrease in extracellular glucose concentration (mM/s)
50%IncGlucosePerturbationConc	Transient Concentrations of metabolites for 120 second time course after a 50% increase in extracellular glucose concentration (mM)
50%DecGlucosePerturbationConc	Transient Concentrations of metabolites for 120 second time course after a 50% decrease in extracellular glucose concentration (mM)

## Sheet: SteadyStateFlux
Reaction	Original model Positive Flux Values (mM/s)	Regulation model Positive Flux Values (mM/s)
1,3-beta-glucan synthase	0.0630273	0.064328
1,4-alpha-glucan branching enzyme	0.0287735	0.0293673
1-(5-phosphoribosyl)-5-[(5-phosphoribosylamino)methylideneamino)imidazole-4-carboxamide isomerase	0.00416414	0.00425008
1-acyl-sn-gylcerol-3-phosphate acyltransferase	0.000348008	0.000377241
2,5-diamino-6-ribitylamino-4(3H)-pyrimidinone 5-phosphate deaminase	4.99424e-05	5.09731e-05
2,5-diamino-6-ribosylamino-4(3H)-pyrimidinone 5-phosphate reductase (NADPH)	4.99424e-05	5.09731e-05
2-aceto-2-hydroxybutanoate synthase	0.00951792	0.00971434
2-aminoadipate transaminase	0.0132858	0.01356
2-deoxy-D-arabino-heptulosonate 7-phosphate synthetase	0.0132531	0.0135266
2-isopropylmalate hydratase	0.0138807	0.0141671
2-isopropylmalate synthase	0.0138807	0.0141671
2-methylcitrate dehydratase	0.0132858	0.01356
2-oxo-4-methyl-3-carboxypentanoate decarboxylation	0.0138807	0.0141671
3,5-bisphosphate nucleotidase	0.00515556	0.00526195
3,4-dihydroxy-2-butanone-4-phosphate synthase	9.98848e-05	0.000101946
3-dehydroquinate dehydratase	0.0132531	0.0135266
3-dehydroquinate synthase	0.0132531	0.0135266
3-dehydrosphinganine reductase	2.3144e-05	2.31572e-05
3-hydroxyacyl-CoA dehydrogenase (3-oxohexacosyl-CoA)	0.027299	0.0274183
3-hydroxyacyl-CoA dehydrogenase (3-oxohexadecanoyl-CoA)	0.027299	0.0274183
3-hydroxyacyl-CoA dehydrogenase (3-oxooctadecanoyl-CoA)	0.027299	0.0274183
3-hydroxyacyl-CoA dehydrogenase (3-oxotetradecanoyl-CoA)	0.027299	0.0274183
3-isopropylmalate dehydratase	0.0138807	0.0141671
3-isopropylmalate dehydrogenase	0.0138807	0.0141671
3-phosphoshikimate 1-carboxyvinyltransferase	0.0132531	0.0135266
5,10-methylenetetrahydrofolatereductase (NADPH)	0.00363091	0.00368868
acetohydroxy acid isomeroreductase	0.0281575	0.0287386
acetolactate synthase	0.0281575	0.0287386
acetyl-CoA C-acetyltransferase	0.0022821	0.0022834
acetyl-Coa carboxylase	0.000416592	0.00041683
acetyl-CoA hydrolase	0.222721	0.228474
acetyl-CoA synthetase	0.156717	0.15901
acetylglutamate kinase	0.0075352	0.0076907
acteylornithine transaminase	0.0075352	0.0076907
adenosine kinase	0.000854829	0.000855318
adenosylhomocysteinase	0.000854829	0.000855318
adenylate kinase	0.0415306	0.0414643
adenylate kinase (GTP)	0.0528244	0.053914
adenylosuccinate lyase	0.00606723	0.00619198
adenylosuccinate synthase	0.00719326	0.00734171
adenylsuccinate lyase	0.00719326	0.00734171
adenylyl-sulfate kinase	0.00515556	0.00526195
alanine glyoxylate aminotransferase	0.0223136	0.0242033
*alcohol dehydrogenase, reverse rxn (acetaldehyde -> ethanol)	0.81848	0.862155
aldehyde dehydrogenase (acetaldehyde, NADP)	0.0572775	0.0606434
alpha,alpha-trehalose-phosphate synthase (UDP-forming)	0.00129689	0.00132366
anthranilate phosphoribosyltransferase	0.00155376	0.00158583
anthranilate synthase	0.00155376	0.00158583
argininosuccinate lyase	0.0075352	0.0076907
argininosuccinate synthase	0.0075352	0.0076907
asparagine synthase (glutamine-hydrolysing)	0.00951792	0.00971434
aspartate carbamoyltransferase	0.00682652	0.0069674
aspartate kinase	0.0811075	0.0813314
aspartate transaminase	0.127766	0.128952
aspartate-semialdehyde dehydrogenase	0.0811075	0.0813314
ATP phosphoribosyltransferase	0.00416414	0.00425008
ATP synthase	3.37902	3.39536
*ATPase, cytosolic	0.417819	0.404829
bicarbonate formation	0.260394	0.272847
C-14 sterol reductase	0.000378574	0.00037879
C-3 sterol dehydrogenase	0.000375466	0.00037568
C-3 sterol dehydrogenase (4-methylzymosterol)	0.000375466	0.00037568
C-3 sterol keto reductase (4-methylzymosterol)	0.000375466	0.00037568
C-3 sterol keto reductase (zymosterol)	0.000375466	0.00037568
C-4 methyl sterol oxidase	0.000375466	0.00037568
C-4 methyl sterol oxidase	0.000375466	0.00037568
C-4 methyl sterol oxidase	0.000375466	0.00037568
C-4 sterol methyl oxidase (4,4-dimethylzymosterol)	0.000375466	0.00037568
C-8 sterol isomerase	5.32811e-06	5.33116e-06
C-s24 sterol reductase	0.00035604	0.000356244
carbamoyl-phosphate synthase (glutamine-hydrolysing)	0.0143617	0.0146581
catalase	0.00341326	0.0034837
CDP-diacylglycerol synthase	0.000304424	0.000304598
ceramide-1 hydroxylase (24C)	2.3144e-05	2.31572e-05
ceramide-1 synthase (24C)	2.3144e-05	2.31572e-05
cholestenol delta-isomerase, lumped reaction	0.000362978	0.000363185
chorismate mutase	0.0116993	0.0119408
chorismate synthase	0.0132531	0.0135266
cis-aconitate(3-) to isocitrate	0.0800165	0.083097
citrate synthase	0.0800165	0.083097
citrate to cis-aconitate(3-)	0.0800165	0.083097
CTP synthase (NH3)	0.00277458	0.00283184
cystathionine beta-synthase	0.00237948	0.00242858
cystathionine g-lyase	0.00594974	0.00598804
cystathionine gamma-synthase	0.00357026	0.00355945
cytidylate kinase (CMP)	0.00247015	0.00252724
cytochrome P450 lanosterol 14-alpha-demethylase (NAD)	0.000378574	0.00037879
D-arabinose 1-dehydrogenase (NAD)	0.027299	0.0274183
D-arabinose 1-dehydrogenase (NADP)	0.027299	0.0274183
dCMP deaminase	0.000134956	0.000137741
deoxyadenylate kinase	0.000199048	0.000203156
deoxyguanylate kinase (dGMP:ATP)	0.000134956	0.000137741
diacylglycerol acyltransferase	0.000100084	0.000129175
diacylglycerol pyrophosphate phosphatase	4.35842e-05	7.26429e-05
dihydoorotic acid dehydrogenase	0.00682652	0.0069674
dihydrofolate reductase	0.000199048	0.000203156
dihydroorotase	0.00682652	0.0069674
dihydroxy-acid dehydratase (2,3-dihydroxy-3-methylbutanoate)	0.0281575	0.0287386
dihydroxy-acid dehydratase (2,3-dihydroxy-3-methylpentanoate)	0.00951792	0.00971434
dihydroxyacetone kinase	0.0453331	0.0419002
dimethylallyltranstransferase	0.000760699	0.000761134
dolichyl-phosphate D-mannosyltransferase	0.045558	0.0464982
dolichyl-phosphate-mannose--protein mannosyltransferase	0.045558	0.0464982
*enolase	1.2313	1.29331
fatty acid synthase (n-C10:0)	1.15865e-05	1.19376e-05
fatty acid synthase (n-C12:0)	1.15865e-05	1.19376e-05
fatty acid synthase (n-C14:0)	1.15865e-05	1.19376e-05
fatty acid synthase (n-C16:0)	1.15865e-05	1.19376e-05
fatty acid synthase (n-C18:0)	1.15865e-05	1.19376e-05
fatty acid synthase (n-C24:0), lumped reaction	2.3144e-05	2.31572e-05
fatty acyl-CoA synthase (n-C10:0CoA)	3.47015e-05	3.43768e-05
fatty acyl-CoA synthase (n-C8:0CoA), lumped reaction	4.6288e-05	4.63144e-05
fatty-acid--CoA ligase (n-C24:0)	2.3144e-05	2.31572e-05
fatty-acid--CoA ligase (octadecanoate)	1.15575e-05	1.12196e-05
fatty-acid--CoA ligase (octanoate)	1.15865e-05	1.19376e-05
fatty-acyl-CoA synthase (n-C12:0CoA)	3.47015e-05	3.43768e-05
fatty-acyl-CoA synthase (n-C14:0CoA)	3.47015e-05	3.43768e-05
fatty-acyl-CoA synthase (n-C16:0CoA)	3.47015e-05	3.43768e-05
fatty-acyl-CoA synthase (n-C18:0CoA)	1.15575e-05	1.12196e-05
formate-tetrahydrofolate ligase	0.000528401	0.000531709
*fructose-bisphosphate aldolase	0.622581	0.653742
fumarase	0.0378338	0.0457231
fumarate reductase	0.0586295	0.0669475
geranyltranstransferase	0.000760699	0.000761134
glucokinase	0.598565	0.644158
*glucose-6-phosphate isomerase	0.598565	0.644158
glucose-6-phosphate isomerase	0.0864892	0.0733457
glutamate 5-kinase	0.00713844	0.00728575
glutamate dehydrogenase (NADP)	0.150879	0.150802
glutamate synthase (NADH2)	0.151092	0.15738
glutamate-5-semialdehyde dehydrogenase	0.00713844	0.00728575
glutamine phosphoribosyldiphosphate amidotransferase	0.00606723	0.00619198
glutamine synthetase	0.210734	0.218251
glyceraldehyde-3-phosphate dehydrogenase	1.2313	1.29331
glycerol dehydrogenase (NADP-dependent)	0.0453331	0.0419002
glycerol-3-phosphatase	0.0453331	0.0419002
glycerol-3-phosphate dehydrogenase (fad)	0.0586295	0.0669475
*glycerol-3-phosphate dehydrogenase (NAD)	0.104311	0.109225
glycerol-3-phosphate/dihydroxyacetone phosphate acyltransferase	0.000348008	0.000377241
glycine cleavage system	0.0378548	0.0386206
glycine hydroxymethyltransferase	0.0182546	0.0186265
glycogen (starch) synthase	0.0287735	0.0293673
GMP synthase	0.00303811	0.00310035
GTP cyclohydrolase II	4.99424e-05	5.09731e-05
guanylate kinase (GMP:ATP)	0.000108607	0.000110709
guanylate kinase (GMP:dATP)	9.94347e-05	0.000101162
*hexokinase (D-glucose:ATP)	0.181015	0.16982
histidinol dehydrogenase	0.00416414	0.00425008
histidinol-phosphatase	0.00416414	0.00425008
histidinol-phosphate transaminase	0.00416414	0.00425008
homoacontinate hydratase	0.0132858	0.01356
homocitrate synthase	0.0132858	0.01356
homoisocitrate dehydrogenase	0.0132858	0.01356
homoserine dehydrogenase (NADH)	0.0811075	0.0813314
homoserine kinase	0.0723817	0.07251
homoserine O-trans-acetylase	0.00872581	0.0088214
hydroxymethylglutaryl CoA reductase	0.0022821	0.0022834
hydroxymethylglutaryl CoA synthase	0.0022821	0.0022834
Imidazole-glycerol-3-phosphate synthase	0.00416414	0.00425008
imidazoleglycerol-phosphate dehydratase	0.00416414	0.00425008
IMP cyclohydrolase	0.0102314	0.0104421
IMP dehydrogenase	0.00303811	0.00310035
indole-3-glycerol-phosphate synthase	0.00155376	0.00158583
inorganic diphosphatase	0.0416057	0.0433358
inositolphosphotransferase	2.3144e-05	2.31572e-05
IPC synthase	2.3144e-05	2.31572e-05
isocitrate dehydrogenase (NADP)	0.0577029	0.0588937
isocitrate lyase	0.0223136	0.0242033
isoleucine transaminase	0.00951792	0.00971434
isopentenyl-diphosphate D-isomerase	0.000760699	0.000761134
ketol-acid reductoisomerase (2-aceto-2-hydroxybutanoate)	0.00951792	0.00971434
L-alanine transaminase	0.0421429	0.0444419
L-aminoadipate-semialdehyde dehydrogenase (NADH)	0.0132858	0.01356
L-glutamate 5-semialdehyde dehydratase	0.00713844	0.00728575
L-hydroxyproline dehydrogenase (NADP)	0.0272989	0.0274182
L-hydroxyproline reductase (NAD)	0.0272989	0.0274182
L-threonine deaminase	0.00356818	0.0037263
lanosterol synthase	0.00038035	0.000380567
leucine transaminase	0.0138807	0.0141671
malate dehydrogenase	0.0378338	0.0457231
mannose-1-phosphate guanylyltransferase	0.0455812	0.0465214
mannose-6-phosphate isomerase	0.0455812	0.0465214
methenyltetrahydrifikate cyclohydrolase	0.0157702	0.0161023
methionine adenosyltransferase	0.000854829	0.000855318
methionine synthase	0.00363091	0.00368868
methylenetetrahydrofolate dehydrogenase (NADP)	0.0157702	0.0161023
mevalonate kinase (ctp)	0.0022821	0.0022834
mevalonate pyrophoshate decarboxylase	0.0022821	0.0022834
microsomal beta-keto-reductase	0.027299	0.0274183
microsomal beta-keto-reductase	0.027299	0.0274183
microsomal beta-keto-reductase	0.027299	0.0274183
microsomal beta-keto-reductase	0.027299	0.0274183
MIPC synthase	2.3144e-05	2.31572e-05
myo-inositol 1-phosphatase	8.49723e-05	8.50209e-05
myo-inositol-1-phosphate synthase	0.00013126	0.000131335
N-acetyl-g-glutamyl-phosphate reductase	0.0075352	0.0076907
non-enzymatic reaction	0.0132858	0.01356
nucleoside-diphosphate kinase (ATP:CDP)	0.000188057	0.000243837
nucleoside-diphosphate kinase (ATP:UDP)	0.0958723	0.0978508
O-acetylhomoserine (thiol)-lyase	0.00515556	0.00526195
ornithine carbamoyltransferase	0.0075352	0.0076907
ornithine transacetylase	0.0075352	0.0076907
orotate phosphoribosyltransferase	0.00682652	0.0069674
orotidine-5-phosphate decarboxylase	0.00682652	0.0069674
phenylalanine transaminase	0.00634546	0.00647641
phosphatidylethanolamine methyltransferase	0.000160065	0.000160157
phosphatidylinositol synthase	8.49723e-05	8.50209e-05
phosphatidylserine decarboxylase	0.00019875	0.000198863
phosphatidylserine synthase	0.000219452	0.000219577
phosphoadenylyl-sulfate reductase (thioredoxin)	0.00515556	0.00526195
*phosphofructokinase	0.622581	0.653742
phosphoglucomutase	0.0930977	0.095019
*phosphoglycerate kinase	1.2313	1.29331
*phosphoglycerate mutase	1.2313	1.29331
phospholipid methyltransferase	0.000160065	0.000160157
phospholipid methyltransferase	0.000160065	0.000160157
phosphomannomutase	0.0455812	0.0465214
phosphomevalonate kinase	0.0022821	0.0022834
phosphoribosyl-AMP cyclohydrolase	0.00416414	0.00425008
phosphoribosyl-ATP pyrophosphatase	0.00416414	0.00425008
phosphoribosylaminoimidazole carboxylase	0.00606723	0.00619198
phosphoribosylaminoimidazole synthase	0.00606723	0.00619198
phosphoribosylaminoimidazolecarboxamide formyltransferase	0.0102314	0.0104421
phosphoribosylaminoimidazolesuccinocarboxamide synthase	0.00606723	0.00619198
phosphoribosylanthranilate isomerase	0.00155376	0.00158583
phosphoribosylformylglycinamidine synthase	0.00606723	0.00619198
phosphoribosylglycinamide formyltransferase	0.00606723	0.00619198
phosphoribosylglycinamide synthase	0.00606723	0.00619198
phosphoribosylpyrophosphate synthetase	0.0186117	0.0189953
prephenate dehydratase	0.00634546	0.00647641
prephenate dehydrogenase (NADP)	0.00535388	0.00546437
pyrimidine phosphatase	4.99424e-05	5.09731e-05
pyrroline-5-carboxylate reductase	0.00713844	0.00728575
pyruvate carboxylase	0.245616	0.257772
*pyruvate decarboxylase	0.81785	0.865146
pyruvate dehydrogenase	0.0572146	0.0574941
*pyruvate kinase	1.20479	1.26626
riboflavin synthase	9.98848e-05	0.000101946
riboflavin synthase	4.99424e-05	5.09731e-05
ribonucleoside-diphosphate reductase	9.96136e-05	0.000101994
ribonucleoside-diphosphate reductase (GDP)	0.000134956	0.000137741
ribonucleoside-diphosphate reductase (UDP)	0.000334004	0.000340897
ribonucleoside-triphosphate reductase (ATP)	9.94347e-05	0.000101162
ribose-5-phosphate isomerase	0.0167922	0.0171384
ribulose 5-phosphate 3-epimerase	0.0168921	0.0172404
S-adenosyl-methionine delta-24-sterol-c-methyltransferase	1.16552e-05	1.16619e-05
saccharopine dehydrogenase (NAD, L-lysine forming)	0.0132858	0.01356
saccharopine dehydrogenase (NADP, L-glutamate forming)	0.0132858	0.01356
serine C-palmitoyltransferase	2.3144e-05	2.31572e-05
shikimate dehydrogenase	0.0132531	0.0135266
shikimate kinase	0.0132531	0.0135266
squalene epoxidase (NAD)	0.00038035	0.000380567
squalene synthase	0.00038035	0.000380567
steryl ester hydrolase	4.5067e-05	4.50927e-05
succinate-CoA ligase (ADP-forming)	0.000796101	0.000883657
sulfate adenylyltransferase (ADP)	0.00515556	0.00526195
sulfite reductase (NADPH2)	0.00515556	0.00526195
thioredoxin reductase (NADPH)	0.00582356	0.00594374
threonine aldolase	0.0579078	0.0576529
threonine synthase	0.0723817	0.07251
thymidylate synthase	0.000199048	0.000203156
transaldolase	0.00181948	0.00185687
transketolase	0.00181948	0.00185687
transketolase	0.0150726	0.0153835
trehalose-phosphatase	0.00129689	0.00132366
triacylglycerol lipase	5.65002e-05	5.65325e-05
*triose-phosphate isomerase	0.622233	0.653365
tryptophan synthase (indoleglycerol phosphate)	0.00155376	0.00158583
tyrosine transaminase	0.00535388	0.00546437
UMP kinase	0.00310858	0.00317273
uridylate kinase (dUMP)	0.000334004	0.000340897
UTP-glucose-1-phosphate uridylyltransferase	0.0930977	0.095019
valine transaminase	0.0142769	0.0145715
ammonia transport	0.3171	0.323637
CO2 transport	0.792754	0.831463
ethanol transport	0.81848	0.862155
glucose transport	0.77958	0.813978
O2 transport	0.00756824	0.00764106
phosphate transport	0.0116	0.0116
succinate transport	0.0801469	0.0902671
sulfate uniport	0.00626539	0.00639469
isa acyl-CoA	0.000796101	0.000883657
biomass production	0.0554916	0.0566368
growth	0.0554916	0.0566368
lipid production	0.0555012	0.0555329

## Sheet: SteadyStateConcentration
Metabolite	Original Model Concentration (mM)	Regulation Model Concentration (mM)
(1->3)-beta-D-glucan [intracellular]	0.551418	0.465143
(2R,3R)-2,3-dihydroxy-3-methylpentanoate [intracellular]	0.548284	0.688656
(2R,3S)-3-isopropylmalate(2-) [intracellular]	0.548493	0.683952
(2S)-2-[5-amino-1-(5-phospho-beta-D-ribosyl)imidazole-4-carboxamido]succinic acid [intracellular]	0.548982	0.601674
(2S)-2-isopropyl-3-oxosuccinate(2-) [intracellular]	0.548573	0.696324
(6R)-5,10-methenyltetrahydrofolic acid [intracellular]	0.549078	0.567088
(N(omega)-L-arginino)succinic acid [intracellular]	0.546833	0.65063
(R)-2,3-dihydroxy-3-methylbutanoate [intracellular]	0.548407	0.640399
(R)-5-diphosphomevalonic acid [intracellular]	0.548178	0.634162
(R)-5-phosphomevalonic acid [intracellular]	0.548158	0.632555
(R)-mevalonate [intracellular]	0.548384	0.612952
(S)-2,3-epoxysqualene [intracellular]	0.54536	0.8633
(S)-2-acetyl-2-hydroxybutanoate [intracellular]	0.548329	0.692041
(S)-3-hydroxyhexacosanoyl-CoA [intracellular]	0.548986	0.545805
(S)-3-hydroxypalmitoyl-CoA [intracellular]	0.548986	0.545805
(S)-3-hydroxytetradecanoyl-CoA [intracellular]	0.548986	0.545805
(S)-3-methyl-2-oxopentanoate [intracellular]	0.548267	0.692782
(S)-dihydroorotate [intracellular]	0.547815	0.630604
(S)-malate(2-) [intracellular]	0.54861	0.644387
1-(2-carboxyphenylamino)-1-deoxy-D-ribulose 5-phosphate [intracellular]	0.552706	0.459724
1-(5-phospho-D-ribosyl)-5-[(5-phospho-D-ribosylamino)methylideneamino]imidazole-4-carboxamide [intracellular]	0.551053	0.480945
1-(5-phosphoribosyl)-5-AMP [intracellular]	0.550903	0.484437
1-acyl-sn-glycerol 3-phosphate [intracellular]	0.549757	0.528652
1-C-(indol-3-yl)glycerol 3-phosphate [intracellular]	0.552995	0.422988
1-phosphatidyl-1D-myo-inositol [intracellular]	0.551454	0.500972
1-pyrroline-3-hydroxy-5-carboxylic acid [intracellular]	0.549014	0.552195
1-pyrroline-5-carboxylate [intracellular]	0.548314	0.617895
10-formyltetrahydrofolic acid [intracellular]	0.549182	0.566801
14-demethyllanosterol [intracellular]	0.545926	0.720536
1D-myo-inositol 1-phosphate [intracellular]	0.550798	0.483061
2,5-diamino-4-hydroxy-6-(5-phosphoribosylamino)pyrimidine [intracellular]	0.54941	0.475904
2,5-diamino-6-(5-phosphono)ribitylamino-4(3H)-pyrimidinone [intracellular]	0.549463	0.465871
2-acetamido-5-oxopentanoate [intracellular]	0.549168	0.55339
2-acetyllactic acid [intracellular]	0.548381	0.645159
2-formamido-N(1)-(5-phospho-D-ribosyl)acetamidine [intracellular]	0.549798	0.500049
2-hydroxy-3-oxobutyl phosphate [intracellular]	0.550411	0.456489
2-isopropylmalate(2-) [intracellular]	0.548391	0.676264
2-isopropylmaleic acid [intracellular]	0.54844	0.68
2-oxaloglutaric acid [intracellular]	0.548906	0.723098
2-oxoadipic acid [intracellular]	0.549212	0.67865
2-oxobutanoate [intracellular]	0.548554	0.658387
2-oxoglutarate [intracellular]	0.548808	0.664427
*2-phospho-D-glyceric acid [intracellular]	0.0515488	0.0580054
2-trans,6-trans-farnesyl diphosphate [intracellular]	0.547264	0.69501
3-phospho-5-adenylyl sulfate [intracellular]	0.550284	0.51455
3-(4-hydroxyphenyl)pyruvate [intracellular]	0.551528	0.586202
3-(imidazol-4-yl)-2-oxopropyl dihydrogen phosphate [intracellular]	0.55075	0.466318
3-dehydro-4-methylzymosterol [intracellular]	0.547191	0.611479
3-dehydroquinate [intracellular]	0.550239	0.562213
3-dehydroshikimate [intracellular]	0.550473	0.561808
3-dehydrosphinganine [intracellular]	0.548898	0.72571
3-hydroxy-3-methylglutaryl-CoA [intracellular]	0.548417	0.552857
3-hydroxyoctadecanoyl-CoA [intracellular]	0.548986	0.545805
3-methyl-2-oxobutanoate [intracellular]	0.548464	0.642803
3-oxohexacosanoyl-CoA [intracellular]	0.549014	0.552195
3-oxooctadecanoyl-CoA [intracellular]	0.549014	0.552195
3-oxopalmitoyl-CoA [intracellular]	0.549014	0.552195
3-oxotetradecanoyl-CoA [intracellular]	0.549014	0.552195
*3-phospho-D-glyceric acid [intracellular]	0.364098	0.404935
*3-phospho-D-glyceroyl dihydrogen phosphate [intracellular]	0.000108995	0.000120666
3-phosphoshikimic acid [intracellular]	0.551067	0.552354
4,4-dimethyl-5alpha-cholesta-8,14,24-trien-3beta-ol [intracellular]	0.546025	0.721687
4-methyl-2-oxopentanoate [intracellular]	0.548883	0.652716
4-phospho-L-aspartate [intracellular]	0.548164	0.624137
4alpha-methylzymosterol [intracellular]	0.54716	0.606806
4beta-methylzymosterol-4alpha-carboxylic acid [intracellular]	0.546928	0.645365
5-adenylyl sulfate [intracellular]	0.550087	0.518357
5-xanthylic acid [intracellular]	0.54937	0.571664
5,10-methylenetetrahydrofolate(2-) [intracellular]	0.548953	0.5607
5,6,7,8-tetrahydrofolic acid [intracellular]	0.548917	0.51871
5-[(5-phospho-1-deoxy-D-ribulos-1-ylamino)methylideneamino]-1-(5-phospho-D-ribosyl)imidazole-4-carboxamide [intracellular]	0.551194	0.477816
5-amino-1-(5-phospho-D-ribosyl)imidazole [intracellular]	0.549961	0.495423
5-amino-1-(5-phospho-D-ribosyl)imidazole-4-carboxamide [intracellular]	0.549318	0.519998
5-amino-1-(5-phospho-D-ribosyl)imidazole-4-carboxylic acid [intracellular]	0.54976	0.530561
5-amino-6-(5-phosphoribitylamino)uracil [intracellular]	0.550044	0.490139
5-amino-6-(D-ribitylamino)uracil [intracellular]	0.550149	0.486713
5-formamido-1-(5-phospho-D-ribosyl)imidazole-4-carboxamide [intracellular]	0.54944	0.566322
5-methyltetrahydrofolate(2-) [intracellular]	0.548911	0.553477
5-O-(1-carboxyvinyl)-3-phosphoshikimic acid [intracellular]	0.550771	0.617422
5-O-phosphono-alpha-D-ribofuranosyl diphosphate [intracellular]	0.550685	0.493992
5-phospho-beta-D-ribosylamine [intracellular]	0.550344	0.459436
5-phosphoribosyl-ATP [intracellular]	0.550759	0.489879
6,7-dimethyl-8-(1-D-ribityl)lumazine [intracellular]	0.551683	0.397538
7-phospho-2-dehydro-3-deoxy-D-arabino-heptonic acid [intracellular]	0.550014	0.562602
*acetaldehyde [intracellular]	0.120059	0.125849
acetate [intracellular]	0.548831	0.58037
acetoacetyl-CoA [intracellular]	0.548607	0.529119
acetyl-CoA [intracellular]	0.54879	0.507661
acyl-CoA [intracellular]	0.548666	0.520316
adenosine [intracellular]	0.548697	0.555083
adenosine 3,5-bismonophosphate [intracellular]	0.548762	0.554598
*ADP [intracellular]	1.71855	1.72762
aldehydo-D-glucose 6-phosphate [intracellular]	0.550844	0.485243
alpha,alpha-trehalose [intracellular]	0.553735	0.401224
alpha,alpha-trehalose 6-phosphate [intracellular]	0.553422	0.407927
alpha-D-ribose 5-phosphate [intracellular]	0.550514	0.500419
ammonium [intracellular]	0.548502	0.51662
*AMP [intracellular]	1.2591	1.27051
amylose [intracellular]	0.551411	0.464949
anthranilate [intracellular]	0.551007	0.522093
*ATP [intracellular]	1.09196	1.09433
*beta-D-glucose 6-phosphate [intracellular]	0.49736	0.428596
bicarbonate [intracellular]	0.548859	0.589116
biomass [intracellular]	0.548917	0.560361
but-1-ene-1,2,4-tricarboxylic acid [intracellular]	0.548779	0.704506
carbamoyl phosphate [intracellular]	0.548758	0.551854
*carbon dioxide [intracellular]	0.999537	1.07456
CDP [intracellular]	0.550298	0.459167
CDP-diacylglycerol [intracellular]	0.550627	0.481516
chorismate(2-) [intracellular]	0.551025	0.619085
cis-aconitate(3-) [intracellular]	0.548513	0.69634
citrate(3-) [intracellular]	0.548479	0.693089
CMP [intracellular]	0.550236	0.455734
coenzyme A [intracellular]	0.548903	0.483107
CTP [intracellular]	0.550099	0.47494
D-arabinono-1,4-lactone [intracellular]	0.549014	0.552195
D-arabinose [intracellular]	0.548986	0.545805
D-erythro-1-(imidazol-4-yl)glycerol 3-phosphate [intracellular]	0.550614	0.47027
D-erythrose 4-phosphate(2-) [intracellular]	0.550335	0.505146
*D-fructose 1,6-bisphosphate [intracellular]	1.34644	1.23329
*D-fructose 6-phosphate [intracellular]	0.104802	0.0971184
*D-glucose [intracellular]	0.0989146	0.0867029
D-glucose 1-phosphate [intracellular]	0.550905	0.482178
D-mannose 1-phosphate [intracellular]	0.550426	0.50532
D-mannose 6-phosphate [intracellular]	0.550361	0.507671
D-ribulose 5-phosphate [intracellular]	0.550443	0.502914
D-xylulose 5-phosphate [intracellular]	0.550373	0.505335
dADP [intracellular]	0.548851	0.542786
dAMP [intracellular]	0.548718	0.54311
dATP [intracellular]	0.549056	0.541579
dCMP [intracellular]	0.549754	0.46927
decanoate [intracellular]	0.549144	0.624869
decanoyl-CoA [intracellular]	0.549062	0.544783
dGDP [intracellular]	0.549485	0.519621
dGMP [intracellular]	0.54941	0.518965
diglyceride [intracellular]	0.549335	0.527399
dihydrofolic acid [intracellular]	0.548959	0.527224
diphosphate [intracellular]	0.549007	0.55114
dolichyl D-mannosyl phosphate [intracellular]	0.549819	0.519405
dolichyl phosphate [intracellular]	0.548181	0.578595
dTMP [intracellular]	0.550234	0.532538
dUDP [intracellular]	0.550266	0.504559
dUMP [intracellular]	0.550205	0.503228
episterol [intracellular]	0.54914	0.527491
ergosta-5,7,22,24(28)-tetraen-3beta-ol [intracellular]	0.549296	0.513457
ergosterol [intracellular]	0.549276	0.505557
ergosterol ester [intracellular]	0.548977	0.525257
*ethanol [intracellular]	49.9805	51.6365
FAD [intracellular]	0.549019	0.559369
FADH2 [intracellular]	0.548981	0.538631
fatty acid [intracellular]	0.548665	0.571441
fecosterol [intracellular]	0.549117	0.528174
formate [intracellular]	0.5491	0.601015
fumarate(2-) [intracellular]	0.548687	0.636089
GDP [intracellular]	0.549417	0.529015
GDP-alpha-D-mannose [intracellular]	0.550962	0.477685
geranyl diphosphate [intracellular]	0.54787	0.641355
*glyceraldehyde 3-phosphate [intracellular]	0.0437326	0.0401424
*glycerol [intracellular]	0.150265	0.136701
glycerone [intracellular]	0.549999	0.508201
*glycerone phosphate [intracellular]	0.60309	0.557797
glycine [intracellular]	0.54823	0.594042
glycogen [intracellular]	0.551552	0.460775
glyoxylate [intracellular]	0.5488	0.632896
GMP [intracellular]	0.549116	0.532035
GTP [intracellular]	0.549437	0.525249
homocitrate(3-) [intracellular]	0.548733	0.699907
homoisocitrate(3-) [intracellular]	0.548828	0.70937
hydrogen peroxide [intracellular]	0.549196	0.542661
hydrogen sulfide [intracellular]	0.550698	0.478279
IMP [intracellular]	0.549294	0.565712
inositol phosphomannosylinositol phosphoceramide [intracellular]	0.555748	0.665289
inositol-P-ceramide B [intracellular]	0.551727	0.856295
isocitrate(3-) [intracellular]	0.54855	0.699777
isopentenyl diphosphate [intracellular]	0.548449	0.592076
keto-phenylpyruvate [intracellular]	0.551479	0.579015
L-2-aminoadipate(2-) [intracellular]	0.548734	0.64128
L-alanine [intracellular]	0.548058	0.576371
L-allysine [intracellular]	0.548878	0.630578
L-arginine [intracellular]	0.547095	0.56395
L-asparagine [intracellular]	0.547765	0.581969
L-aspartate [intracellular]	0.548102	0.622978
L-aspartate 4-semialdehyde [intracellular]	0.548094	0.619721
L-citrulline [intracellular]	0.547669	0.576082
L-cystathionine [intracellular]	0.549196	0.626495
L-cysteine [intracellular]	0.550152	0.557753
L-gamma-glutamyl phosphate [intracellular]	0.54838	0.62117
L-glutamate [intracellular]	0.548294	0.621089
L-glutamic 5-semialdehyde [intracellular]	0.548332	0.616185
L-glutamine [intracellular]	0.54791	0.582538
L-histidine [intracellular]	0.550686	0.431166
L-histidinol [intracellular]	0.550483	0.428233
L-histidinol phosphate [intracellular]	0.550352	0.433927
L-homocysteine [intracellular]	0.549815	0.532638
L-homoserine [intracellular]	0.548018	0.61563
L-isoleucine [intracellular]	0.547705	0.655035
L-leucine [intracellular]	0.548408	0.61597
L-lysine [intracellular]	0.548403	0.599618
L-methionine [intracellular]	0.549827	0.566867
L-phenylalanine [intracellular]	0.551074	0.543957
L-proline [intracellular]	0.548269	0.612215
L-saccharopine [intracellular]	0.548163	0.711278
L-serine [intracellular]	0.548363	0.643748
L-threonine [intracellular]	0.998299	1.12835
L-tryptophan [intracellular]	1.00393	0.974831
L-tyrosine [intracellular]	0.551148	0.550997
L-valine [intracellular]	0.998148	1.10437
lanosterol [intracellular]	0.545194	0.873328
laurate [intracellular]	0.549288	0.639286
lauroyl-CoA [intracellular]	0.549138	0.555939
lignocerate [intracellular]	0.549892	0.735034
lipid [intracellular]	0.549	0.549
malonyl-CoA [intracellular]	0.548788	0.543029
mannan [intracellular]	0.550723	0.490627
mannosylinositol phosphorylceramide [intracellular]	0.553779	0.751804
myo-inositol [intracellular]	0.55089	0.480301
myristate [intracellular]	0.549438	0.654667
myristoyl-CoA [intracellular]	0.549217	0.567864
N(1)-(5-phospho-D-ribosyl)glycinamide [intracellular]	0.549727	0.492274
N(2)-acetyl-L-ornithine [intracellular]	0.548664	0.518927
N(2)-formyl-N(1)-(5-phospho-D-ribosyl)glycinamide [intracellular]	0.550056	0.53494
N(6)-(1,2-dicarboxyethyl)-AMP [intracellular]	0.548456	0.639272
N-(24-hydroxytetracosanyl)sphinganine [intracellular]	0.549922	0.961262
N-(5-phospho-beta-D-ribosyl)anthranilate [intracellular]	0.552715	0.463577
N-acetyl-L-gamma-glutamyl phosphate [intracellular]	0.549153	0.560799
N-acetyl-L-glutamate(2-) [intracellular]	0.549014	0.562884
N-carbamoyl-L-aspartate [intracellular]	0.547837	0.628457
N-tetracosanylsphinganine [intracellular]	0.549644	0.98001
*NAD(+) [intracellular]	1.50326	1.50416
*NADH [intracellular]	0.0867309	0.0858371
NADP(+) [intracellular]	0.549013	0.552308
NADPH [intracellular]	0.548987	0.545691
O-acetyl-L-homoserine [intracellular]	0.547881	0.646964
O-phospho-L-homoserine [intracellular]	0.548091	0.61673
octanoate [intracellular]	0.549007	0.611356
octanoyl-CoA [intracellular]	0.54899	0.534347
ornithine [intracellular]	0.547935	0.573006
orotate [intracellular]	0.547972	0.622853
orotidine 5-(dihydrogen phosphate) [intracellular]	0.549701	0.557558
oxaloacetate(2-) [intracellular]	0.548566	0.659251
oxygen [intracellular]	0.54936	0.534664
palmitate [intracellular]	0.549596	0.671078
palmitoyl-CoA [intracellular]	0.5493	0.58061
phosphate [intracellular]	0.549	0.549
phosphatidate [intracellular]	0.549537	0.562161
phosphatidyl-L-serine [intracellular]	0.548928	0.680522
phosphatidyl-N,N-dimethylethanolamine [intracellular]	0.549956	0.717056
phosphatidyl-N-methylethanolamine [intracellular]	0.549593	0.675779
phosphatidylcholine [intracellular]	0.550332	0.761967
phosphatidylethanolamine [intracellular]	0.549246	0.638165
*phosphoenolpyruvate [intracellular]	0.0270823	0.0302141
prenyl diphosphate [intracellular]	0.548452	0.593456
prephenate(2-) [intracellular]	0.551094	0.620159
*pyruvate [intracellular]	0.0605406	0.0677568
riboflavin [intracellular]	0.55354	0.310727
S-adenosyl-L-homocysteine [intracellular]	0.549481	0.53898
S-adenosyl-L-methionine [intracellular]	0.549805	0.566672
sedoheptulose 7-phosphate [intracellular]	0.550546	0.50547
shikimate [intracellular]	0.550702	0.554573
*sn-glycerol 3-phosphate [intracellular]	12.8737	11.6719
sphinganine [intracellular]	0.548764	0.724497
squalene [intracellular]	0.545242	0.881897
stearate [intracellular]	0.549761	0.688585
stearoyl-CoA [intracellular]	0.549584	0.595563
succinate(2-) [intracellular]	0.5487	0.607653
succinyl-CoA [intracellular]	0.548683	0.526705
sulphate [intracellular]	0.550163	0.518082
sulphite [intracellular]	0.550658	0.49961
tetracosanoyl-CoA [intracellular]	0.549858	0.644101
trans-4-hydroxy-L-proline [intracellular]	0.548986	0.545805
triglyceride [intracellular]	0.549	0.549
UDP [intracellular]	0.550183	0.514386
UDP-D-glucose [intracellular]	0.552401	0.441196
UMP [intracellular]	0.550012	0.518162
UTP [intracellular]	0.550352	0.510459
zymosterol [intracellular]	0.548575	0.503454
zymosterol intermediate 1a [intracellular]	0.547498	0.585693
zymosterol intermediate 1b [intracellular]	0.547854	0.564433
zymosterol intermediate 1c [intracellular]	0.548226	0.543023
zymosterol intermediate 2 [intracellular]	0.548546	0.511343
thioredoxin disulfide [intracellular]	0.548984	0.552824
thioredoxin dithiol [intracellular]	0.549016	0.545176
H+ [intracellular]	0.549	0.549
water [intracellular]	0.549	0.549
ammonium [extracellular]	1	1
biomass [extracellular]	24.5	24.5
carbon dioxide [extracellular]	1e-05	1e-05
D-glucose [extracellular]	11.1	11.1
ethanol [extracellular]	24.5	24.5
H+ [extracellular]	0.1	0.1
oxygen [extracellular]	24.5	24.5
phosphate [extracellular]	24.5	24.5
succinate(2-) [extracellular]	1	1
sulphate [extracellular]	42.2	42.2
